# Supplementary material for: Context- and Cell-Dependent Effects of Delta-Like 4 Targeting in the Bone Marrow Microenvironment
Source: PLoS One. 2012 Dec 20;7(12):e52450. doi: 10.1371/journal.pone.0052450 (PMC3527506; doi:10.1371/journal.pone.0052450)
Supplement: Table S2 — Primers list. (XLS) [file pone.0052450.s008.xls]

## Sheet: Primers
	Table S2. Primers list.
	Mouse Primers
	m18S	F	CGCAGCTAGGAATAATGGAATAGG
		R	GCCTCAGTTCCGAAAACCAA
	mb2MG	F	TCACGCCACCCACCGGAGAA
		R	TGTGAGGCGGGTGGAACTGTG
	mHPRT	F	CAGCCCCAAAATGGTTAAGGTTGC
		R	CTGGCCTGTATCCAACACTTCGAG
	mAngpt1	F	GCCTTTGCACTAAAGAAGGTGT
		R	CTGCACAGTCTCGAAATGGTT
	mAngpt2	F	CAGCAGCACAAACTCGGAAAC
		R	TCGAGTCTTGTCGTCTGGTTTAG
	mBMP4	F	GAGCCAACACTGTGAGGAGTTT
		R	CCCTGGGATGTTCTCCAGAT
	mCD31	F	CGAGAACTTTGTGCTCATGGAA
		R	CTTGGCAGCGAAACACTAACAC
	mCSF1	F	GCCACATGATTGGGAATGG
		R	AAAGGCAATCTGGCATGAAGTC
	mCSF2	F	AGGGCGCCTTGAACATGA
		R	CACAGTCCGTTTCCGGAGTT
	mCSF3	F	GCAGGCTCTATCGGGTATTTCC
		R	GCAACATCCAGCTGAAGCAA
	mCXCR4	F	GGGACATCAGTCAGGGGGAT
		R	CTATCGGGGTAAAGGCGGTC
	mDHH	F	CTACTACGAGTCCCGCAACC
		R	ACCGCCAGTGAGTTATCAGC
	mDKK1	F	CTATGAGGGCGGGAACAAGT
		R	ATCTTCAGCGCAAGGGTAGG
	mDll1	F	CGATTCCCCTTCGGCTTCAC
		R	GGGTTTTCTGTTGCGAGGTC
	mDll4	F	TTTGTGACCAAGATCTCAACTACTGTAC
		R	CTTTGGCCCACTGTTGGAA
	mFGF1	F	AGGAGCGACCAGCACATTC
		R	ATATACACTTCGCCCGCACTT
	mFGF2	F	CGACCCACACGTCAAACTAC
		R	GTTGGCACACACTCCCTTGA
	mIGF1	F	AACAAGCCCACAGGCTATGG
		R	AAGCAACACTCATCCACAATGC
	mIGFbp2	F	CTGCACATCCCCAACTGTGA
		R	CGCTGTCCGTTCAGAGACAT
	mIGFbp3	F	GCAGGCAGCCTAAGCACCTA
		R	CCTCCTCGGACTCACTGATGTT
	mIGFbp5	F	AACGAAAAGAGCTACGGCGA
		R	GGTCTCTTCAGCCATCTCGG
	mIL-3	F	CCACCTCAGCCCGCATCTGG
		R	AACATTCCACGGTTCCACGGTT
	mIL-6	F	CTGGGAAATCGTGGAAATGAGA
		R	GCAAGTGCATCATCGTTGTTCAT
	mIL-11	F	CAGCTGACGGAGATCACAGTCT
		R	AAGCTGCAAAGATCCCAATGTC
	mJagged1	F	CCAGTGTTTCGTGCGCCCCT
		R	GCTGGAGGCTGGAGGACCGA
	mJagged2	F	TCATTCCCTTTCAGTTCGCC
		R	CCTCATCTGGAGTGGTGTCATT
	mN-Cadherin	F	AACTTGCCAGAAAACTCCAGA
		R	GCTGTATCTCAGGGAAAGGTT
	mNOS3	F	AGCATCACCTACGACACCCT
		R	AGCGTCTTGAGGTACAGGGC
	mSCF	F	GGCAAATCTTCCAAATGACTATATGA
		R	GCCAACAATGACTAGGCAAAACA
	mSDF-1	F	GCCAACGTCAAGCATCTGAAAA
		R	TCTTCAGCCGTGCAACAATC
	mTHPO	F	GGAACTCATGGGCTCTTTGC
		R	AAGCTCCGGGCGAGATGT
	mVCAM1	F	GCCTCAACGGTACTTTGGATA
		R	TGGAGTCACCGATTTGAGCAAT
	mVE-Cadherin	F	TCCTCTGCATCCTCACTATCACA
		R	GTAAGTGACCAACTGCTCGTGA
	mVEGF-A	F	GTACCTCCACCATGCCAAGT
		R	TCTGCTCTCCTTCTGTCGTG
	Human primers
	h18S	F	GCCCTATCAACTTTCGATGGT
		R	CCGGAATCGAACCCTGATT
	hb2MG	F	TCGCTCCGTGGCCTTAGCTGT
		R	CTTTGGAGTACGCTGGATAGCCTCC
	hHPRT	F	CTTTGCTTTCCTTGGTCAGGCAGT
		R	CGTGGGGTCCTTTTCACCAGCAA
	hAngpt1	F	TGCCAGAACCCAAAAAGGTG
		R	TTACAGTCCAACCTCCCCCA
	hAngpt2	F	GTGAGGATGGCAGCGTTGA
		R	AACAAACTCATTTCCCAGCCAA
	hBMP4	F	AGGAGCTTCCACCACGAAGA
		R	GCAGAGTTTTCACTGGTCCCT
	hCD31	F	GGAGTCCTGCTGACCCTTCTGCT
		R	CGTCCAGTCCGGCAGGCTCT
	hCSF1	F	GATGGAGACCTCGTGCCAAA
		R	AGGTAGCACACTGGATCTTTCA
	hCSF2	F	AGCCTCACCAAGCTCAAGGGC
		R	AGTTTCCGGGGTTGGAGGGCA
	hCSF3	F	CCTTCGCCTCTGCTTTCCAG
		R	TAGAACGCGGTACGACACCT
	hCXCR4	F	TGACTTGTGGGTGGTTGTGT
		R	CCAGGCAGGATAAGGCCAAC
	hDHH	F	GATGAGGAGAACAGTGGAGCC
		R	GTTCACCCGCTCCTTACAAC
	hDKK1	F	TCATAGCACCTTGGATGGGT
		R	GACCGGAGACAAACAGAACCT
	hDll1	F	GGTGCTCTCGGCCTTGCTGTGT
		R	GTTGCGGTTCCCCAGCAGCC
	hDll4	F	GTGGGTCAGAACTGGTTATTGGA
		R	TGCAGATGACCCGGTAAGAGT
	hFGF1	F	GGGGAAATCACCACCTTCACA
		R	CTTGTAATTCCCTGGAGGCAGA
	hFGF2	F	GCAAAAACGGGGGCTTCTT
		R	TGTAGCTTGATGTGAGGGTCG
	hIGF1	F	GGTGGATGCTCTTCAGTTCGT
		R	TACCCTGTGGGCTTGTTGAAA
	hIGFbp2	F	GCGAGGGCACTTGTGAGA
		R	TGAGTGGTCATCGCCATTGT
	hIGFbp3	F	CAGTGTGGAGAGCCCGTCCG
		R	GGAGGGGGTGGAACTTGGGATCA
	hIGFbp5	F	CTACCGCGAGCAAGTCAAGA
		R	GTAGGTCTCCTCGGCCATCT
	hIL-3	F	GCTGGACTTCAACAACCTCA
		R	CTGTTGAATGCCTCCAGGTTTG
	hIL-6	F	CTGAACCTTCCAAAGATGGCTG
		R	ACCAGGCAAGTCTCCTCATT
	hJagged1	F	ACCGCAACCGCATCGT
		R	GCCTCCACAAGCAACGTATAGG
	hJagged2	F	GTCGTCATCCCCTTCCAGTTC
		R	CTCATTCGGGGTGGTATCGTT
	hN-Cadherin	F	TATCGAAGGATGTGCATGAAGG
		R	CAGGCTCACTGCTCTCATATTG
	hNOS3	F	CATCCCTACTCCCACCAGCG
		R	ACCTCCCAGTTCTTCACACGA
	hSCF	F	GTGGATGACCTTGTGGAGTGCGT
		R	GCCTGGGTTCTGGGCTCTTGA
	hSDF-1	F	GCCAACGTCAAGCATCTCAAA
		R	TCTGTTGTTGTTCTTCAGCCG
	hTHPO	F	CTTCGTGACTCCCATGTCCT
		R	CAGGTGTAGGCAAAGGGTGAA
	hVCAM1	F	CCTGGGAAGATGGTCGTGAT
		R	TCTGGGGTGGTCTCGATTTT
	hVE-Cadherin	F	TGAGTCGCAAGAATGCCAAGT
		R	CGGAAGACCTTGCCCACATA
	hVEGF-A	F	GGAGGAGGGCAGAATCATCAC
		R	GGTCTCGATTGGATGGCAGT
